# Supplementary material
Source: publisher site journal article supplement (https://www.spandidos-publications.com/3500/downloadSupplementary)

Figure S1. SIRT1 expression in esophageal cancer. SIRT1 protein expression in (A) KYSE30 and (B) KYSE150 cells. SIRT1 expression decreased gradually as the concentration of rapamycin increased. \*\* $P < 0.01$ , \*\*\* $P < 0.001$  vs. 0 nM. SIRT1, sirtuin 1.

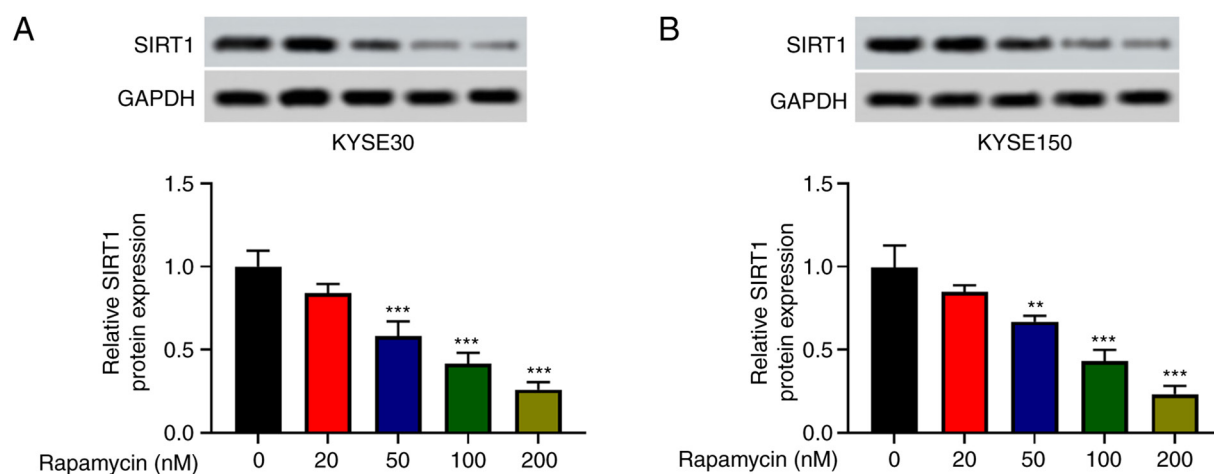

Figure S2. AKT expression in esophageal cancer. (A) AKT in esophageal cancer tissue was upregulated compared with adjacent normal control tissue. \* $P < 0.05$  as indicated. (B) Significant correlation between *SIRT1* expression and AKT expression was observed ( $r = 0.4873$ ;  $P < 0.01$ ). SIRT1, sirtuin 1.

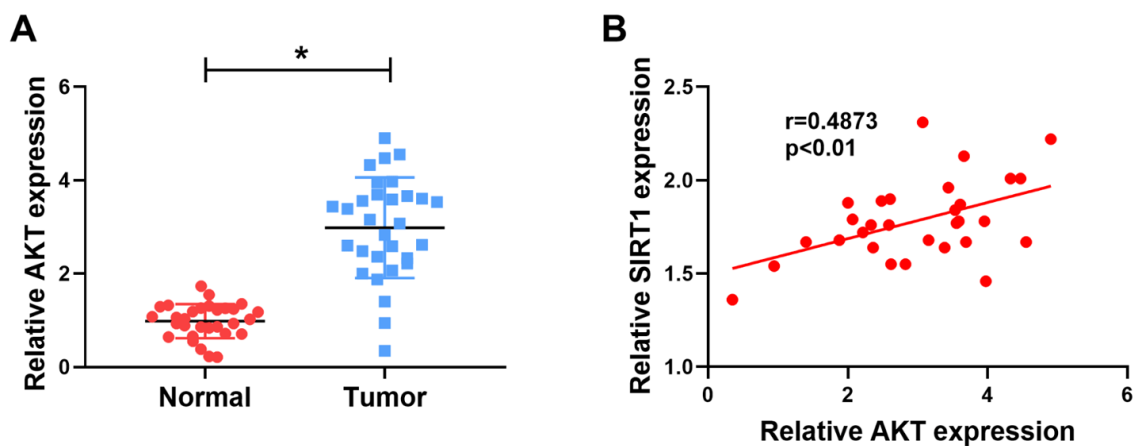

Figure S3. SIRT1 rescues the inhibitory effect of rapamycin on xenograft growth from esophageal cancer cells. (A) Tumor volume and (B) weight from the xenografts of each group are presented. (C) Tumor weight in each group. (D) Reverse transcription-quantitative PCR was conducted to measure *SIRT1* mRNA expression in the tumor tissue of each group. SIRT1, sirtuin 1. \* $P < 0.05$ .

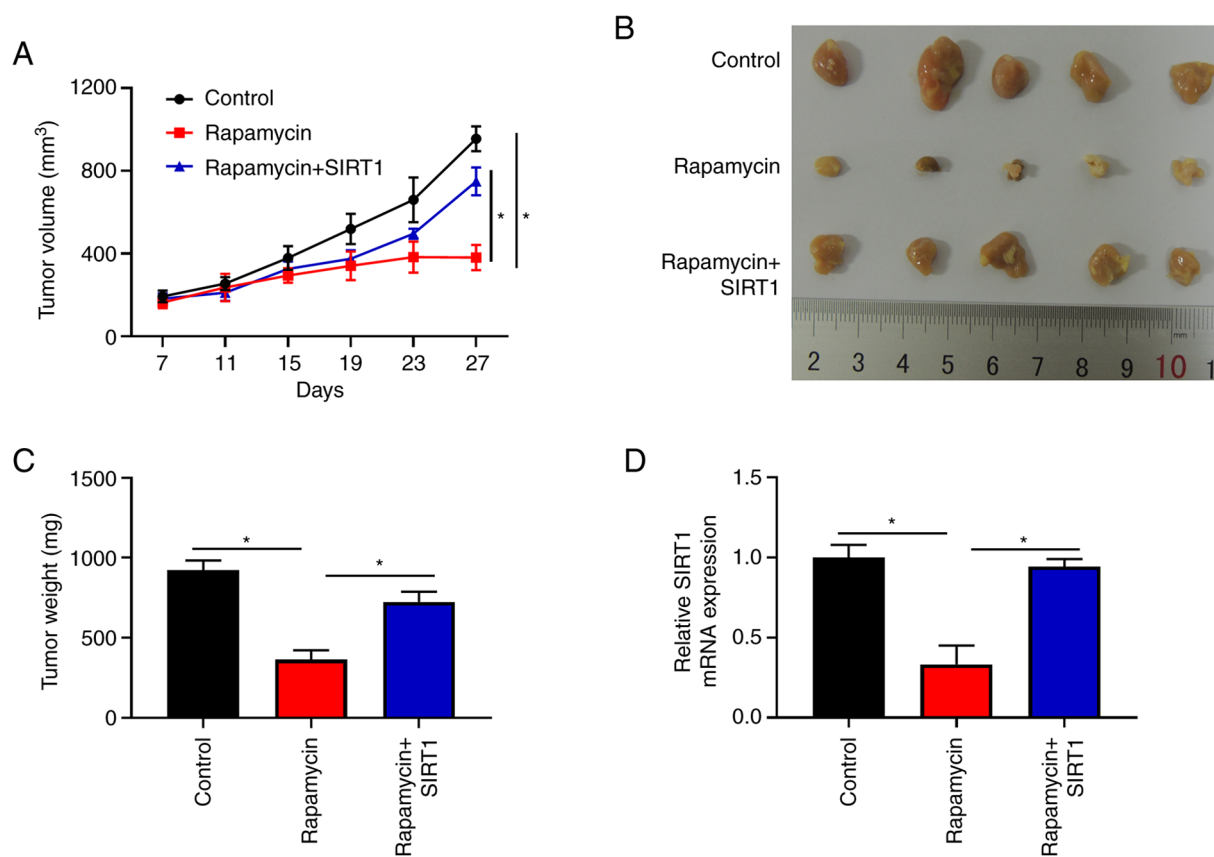

Supplement: Supplementary file 1 [file downloadSupplementary]
